# Supplementary material for: The impact of erbium incorporation on the structure and photophysics of silicon–germanium nanowires
Source: Royal Society of Chemistry journal article supplement (doi:10.1039/c0nr00476f), 2010-01-01
Supplement: c0nr00476f.pdf [file c0nr00476f.pdf]

*Supporting Information*

**The Impact of Erbium Incorporation on the Structure and  
Photophysics of Silicon-Germanium Nanowires**

Ji Wu,<sup>a</sup> Monika Wieligor,<sup>b</sup> T. Waldek Zerda,<sup>b</sup> and Jeffery L. Coffey<sup>a\*</sup>

<sup>a</sup>Department of Chemistry, Texas Christian University, Fort Worth, TX 76129

<sup>b</sup>Department of Physics, Texas Christian University, Fort Worth, TX 76129

**Supporting Figure 1.** Quantitative elemental analyses of the NWs. a) “Sandwich” structure Er-doped SiGe NW; and b) “Er-surface Enriched” SiGe NW.

**Supporting Figure 2.** Room-temperature visible absorption spectrum of a) “Co-deposited Si&Er” Ge core NW; b) “Sandwich” structure Er-doped SiGe NW; and c) “Er-surface Enriched” SiGe NW. All NWs were annealed at 600 °C in N<sub>2</sub> and dispersed in ethylene glycol solution by sonication.

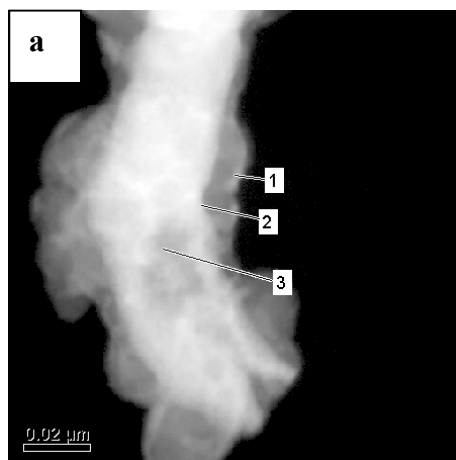

| Label   | at% Si | at% Ge | at% Er |
|---------|--------|--------|--------|
| Point 1 | 50.3   | 43.0   | 6.7    |
| Point 2 | 21.0   | 76.4   | 2.6    |
| Point 3 | 91.7   | 8.3    | 0      |

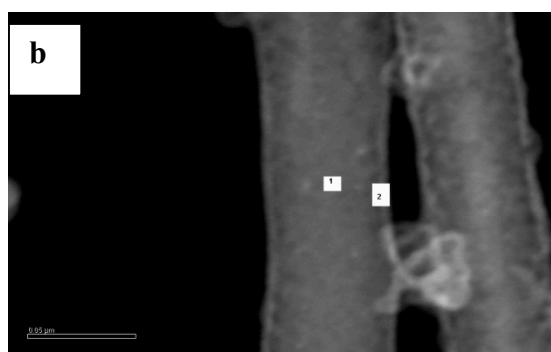

**Supporting Figure 1.** Quantitative elemental analyses of the NWs. a) "Sandwich" structure Er-doped SiGe NW; and b) "Er-surface Enriched" SiGe NW.

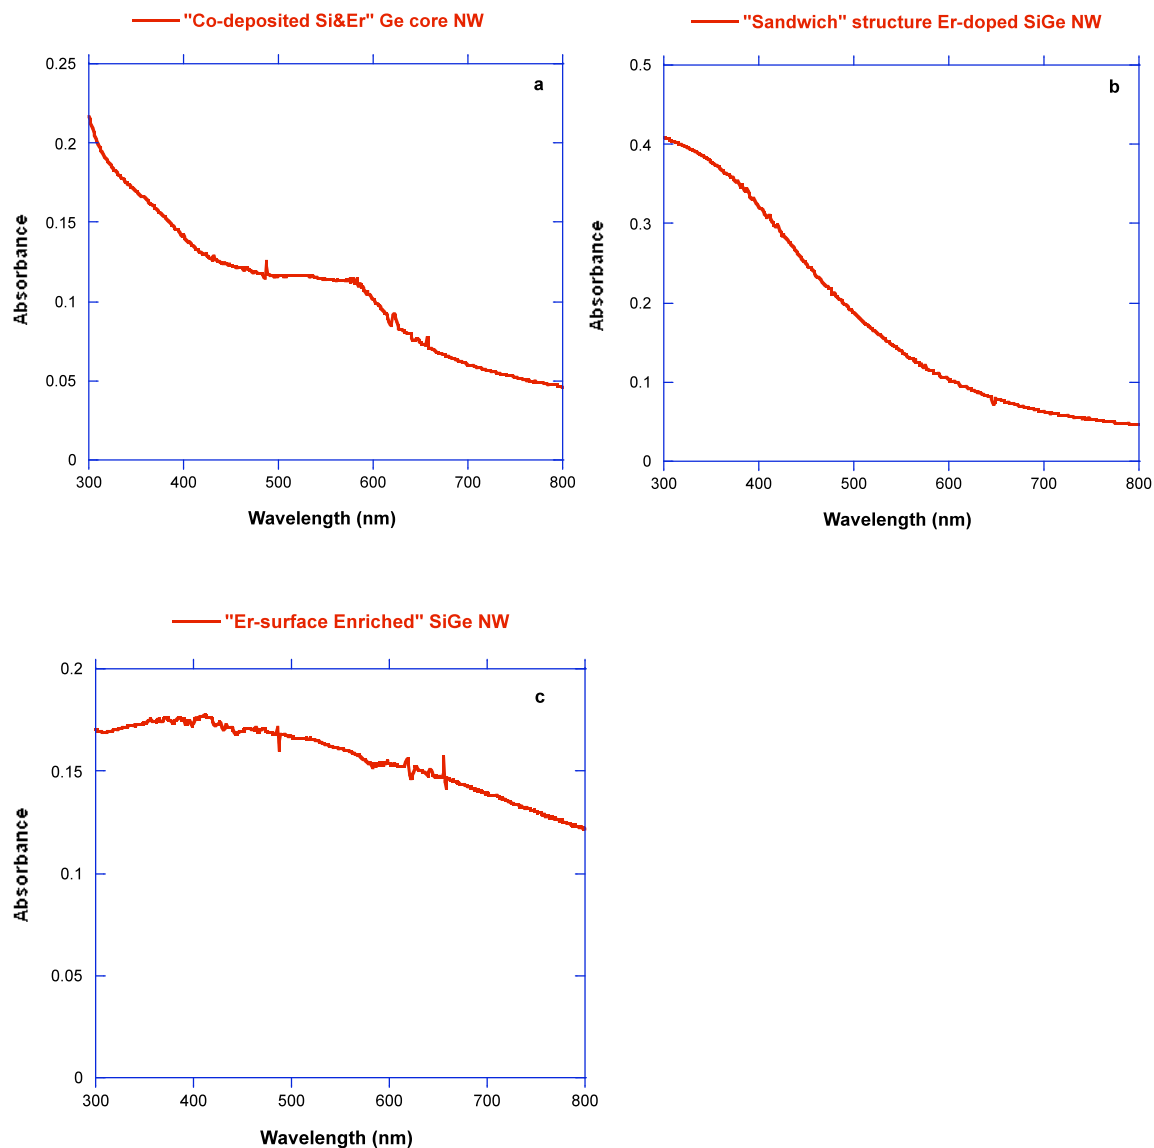

**Supporting Figure 2.** Room-temperature visible absorption spectrum of a) “Co-deposited Si&Er” Ge core NW; b) “Sandwich” structure Er-doped SiGe NW; and c) “Er-surface Enriched” SiGe NW. All NWs were annealed at 600 °C in N<sub>2</sub> and dispersed in ethylene glycol solution by sonication.
